1 Behavioral phenotyping of mice lacking the deubiquitinase USP2

2

3 Shashank Bangalore Srikanta<sup>1,2</sup>, Katarina Stojkovic<sup>1,2</sup>, Nicolas Cermakian<sup>2,3\*</sup>

4

5 <sup>1</sup> Integrated Program in Neuroscience, McGill University, Montréal, Québec, Canada.

6 <sup>2</sup> Laboratory of Molecular Chronobiology, Douglas Research Centre, Montréal, Québec, Canada.

7 <sup>3</sup> Department of Psychiatry, McGill University, Montréal, Québec, Canada.

8

9 \* Corresponding Author

10 Email: [nicolas.cermakian@mcgill.ca](mailto:nicolas.cermakian@mcgill.ca) (N.C.)

11

12

13

## 14 **Abstract**

15        Ubiquitin specific peptidase 2 (USP2) is a deubiquitinating enzyme expressed almost  
16 ubiquitously in the body, including in multiple brain regions. We previously showed that mice  
17 lacking USP2 present altered locomotor activity rhythms and response of the clock to light.  
18 However, the possible implication of USP2 in regulating other behaviors has yet to be tested. To  
19 address this, we ran a battery of behavioral tests on *Usp2* KO mice. Firstly, we confirmed our prior  
20 findings of increased daily activity and reduced activity fragmentation in *Usp2* KO mice. Further,  
21 mice lacking USP2 showed impaired motor coordination and equilibrium, a decrease in anxiety-  
22 like behavior, a deficit in short-term recognition memory and in sensorimotor gating. On the other  
23 hand, no effects of *Usp2* gene deletion were found on spatial memory. Hence, our data uncover  
24 the implication of USP2 in different behaviors and expands the range of the known functions of  
25 this deubiquitinase.

26

27

28

## 29 **Introduction**

30 Ubiquitination is the process of covalent attachment of a 76 kDa long protein called  
31 Ubiquitin to other proteins. While ubiquitination has multiple roles in the functioning of the cell,  
32 including protein localization and trafficking [1], its most salient function is the targeting of tagged  
33 proteins for degradation [2]. Ubiquitination is carried out by a group of enzymes known as E3  
34 ubiquitin ligases [2, 3]. The process of ubiquitination is counteracted by the process of  
35 deubiquitination, which is mediated by enzymes known as deubiquitinases or DUBs. These  
36 opposing processes can, in essence, determine the timing of various processes such as degradation,  
37 activity and localization of proteins.

38 While various DUBs are found in different tissues and cell types, Ubiquitin Specific  
39 Peptidase 2 or USP2 is one of the DUBs that has been found to be expressed almost ubiquitously  
40 in the organism [4–7]. More interestingly, it is the only DUB that has been found to have a  
41 circadian pattern of expression in virtually all the tissues where it is expressed [7, 8].

42 Circadian rhythms are self-sustaining oscillations with a period of approximately 24 hours,  
43 which are sustained at the molecular level by negative feedback loops involving circadian clock  
44 genes [9]. The counterbalance between ubiquitination and deubiquitination is essential to  
45 accurately control the timing of degradation of several clock proteins and hence, to the  
46 maintenance of periodicity in the clock [10]. Previous studies have shown that the deubiquitinase  
47 USP2 modulates the stability and/or localization of clock gene products BMAL1, PER1 and CRY1  
48 [11–14]. Surprisingly though, despite its interaction with many of the core clock components,  
49 knocking out *Usp2* in mice did not lead to proportionally severe circadian deficits [11, 12]. Our  
50 group showed that USP2 modulates the response of the clock to light [11]. We also showed that  
51 *Usp2* KO mice have a slightly longer period than WT littermates [11]. While no other significant

52 phenotypes were noticed under a normal light:dark cycle, a trend towards increased total activity  
53 over 24 hours was observed in the *Usp2* KO mice, compared to WT mice [11].

54 Ubiquitination, and ubiquitinating/deubiquitinating enzymes, have been associated with  
55 various behaviors as well as neurological and psychiatric disorders, such as bipolar disorder [15,  
56 16], neurodevelopmental disorders [15, 17, 18], and Parkinson's disease [19]. Searching the mouse  
57 brain expression data in the Allen Mouse Brain Atlas [20], we noticed that *Usp2* is expressed in  
58 many brain regions. Hence, we aimed to test the hypothesis that USP2 plays a role in modulating  
59 various behaviors beyond circadian rhythms. To test this, we subjected *Usp2* KO and WT mice to  
60 a battery of tests, to assay various behaviors such as daily wheel running behavior, motor  
61 coordination, anxiety-like behavior, sensorimotor gating and memory. We confirmed that the *Usp2*  
62 KO mice showed increased and more consolidated running wheel activity. We also found that they  
63 have reduced balance and motor coordination, as well as a reduction in anxiety-like phenotypes  
64 and short-term recognition memory. There were limited or no effects of *Usp2* gene deletion on  
65 sensorimotor gating and spatial memory.

66

## 67 **Materials and Methods**

### 68 **Animals**

69 *Usp2* KO mice [21] were obtained from Dr. Simon S. Wing and bred in house. *Usp2* KO  
70 and WT littermates (on a C57BL/6J background) were generated by breeding heterozygotes. In  
71 some cases, PER2::LUC knockin mice (on a C57BL/6J background) were used as controls. This  
72 PER2 gene modification was shown not to affect PER2 function, mouse health, general activity or  
73 wheel-running activity [22]. Four such mice were used in the wheel running, rotarod, novel object  
74 recognition and pre-pulse inhibition tests. In all cases, similar effects of the KO were seen  
75 irrespective of whether or not these mice were included in the analyses.

76 Mice were weaned at 3 weeks of age, into cages containing no more than 5 mice per cage.  
77 They were maintained on a 12h:12h light:dark cycle (with light at ~200 lux). At 2 to 3 months of  
78 age, male mice were designated to running wheel or (non-circadian) behavioral cohorts. All  
79 procedures involving animals were carried out in accordance with guidelines of the Canadian  
80 Council on Animal Care and approved by the Animal Care Committees of McGill University and  
81 Douglas Mental Health University Institute (protocol no. 2001-4586). For euthanasia at the end of  
82 the experiments, the animals were first anesthetized by isoflurane inhalation, followed by CO<sub>2</sub>  
83 euthanasia; all efforts were made to minimize suffering.

84

### 85 **Wheel-running behavior**

86 For running wheel experiments, 2 to 3-month-old WT and KO mice (n = 6) were transferred  
87 to running wheel-equipped cages (Actimetrics, Wilmette, IL, USA), where they were singly  
88 housed, with ad-libitum access to food and water. After a baseline week for acclimatization, wheel

89 running activity was recorded for three weeks, in the same LD cycle. The last 10 days of recorded  
90 data were analysed on the Clocklab software Version 6 (Actimetrics, Wilmette, IL, USA). Daily  
91 wheel rotations, number of bouts of activity per day, length of each activity bout and number of  
92 wheel rotations in each bout were quantified. One mouse (KO) was excluded from the analysis  
93 because its wheel running activity was not recorded on the software.

94

## 95 **Non-circadian behavioral tests**

96 WT mice (6-12/group) and *Usp2* KO mice (10-12/group) went through Rotarod, Elevated  
97 plus maze (EPM), Novelty suppressed feeding (NSF), Forced swim test (FST), Novel object  
98 recognition (NOR), Morris water maze (MWM) and Pre-pulse inhibition (PPI) of acoustic startle.  
99 To account for time-of-day effects on behavior, all behavioral tests were carried out between one  
100 and five hours after lights on. Tests were performed under dim light conditions (~15 lux) unless  
101 noted otherwise. The groups (WT and KO) were counterbalanced between tests and between trials.  
102 Mice were habituated to the testing room for 30 minutes, prior to the start of each session of  
103 behavioral testing. EPM, NSF and NOR tests were video recorded to minimize interaction with  
104 the mice and to reduce the resulting stress levels. All the mice in the video recordings of the  
105 behaviors were tracked using the TopScan 2.0 software (Clever Sys, Reston, VA, USA). Since  
106 some tests measured anxiety-like behaviors or could be affected by stress, all mice were given 2  
107 “recovery days” between each test, during which they were not handled or disturbed.

108

## 109 **Rotarod**

110 The Rotarod test assays motor coordination, equilibrium and balance [23]. This test was  
111 carried out over two days. On the first day, each mouse was habituated to the rotarod (Bioseb,

112 Valbonne, France). For the habituation phase, the ridged cylinder was made to rotate at a constant  
113 speed of 5 rotations-per-minute (rpm) for two 3-minute long trials and 10 rpm for two 3-minute  
114 long trials. During each of these trials, the mice were put back on the rod if they fell, until the timer  
115 ran out. Each mouse got a rest period of at least 15 minutes in its home cage between each  
116 subsequent trial.

117 For the testing day, each mouse was tested for three trials. It was placed on the rotarod, which  
118 accelerated at a constant rate, from 4 to 40 rpm, over a 5-minute span (acceleration = 7.2 rpmpm).  
119 When the mouse fell off the cylinder, onto the press plate placed 20 cm below the rod, the time  
120 taken to fall off the rod got recorded. After the fall, they were returned to their home cage. The  
121 greater their latency to fall, the greater is their motor coordination, equilibrium and/or balance.  
122 Two mice were excluded from this analysis (1 WT and 1 KO) as they refused to run on the rotarod.

123

## 124 **Elevated plus maze**

125 Anxiety-like behavior was measured using the elevated plus maze (EPM) [24]. The maze is  
126 elevated 75 cm from the floor and consists of 4 arms shaped like a cross and painted black. Two  
127 opposing arms are enclosed by 10 cm high walls on three sides, while the other two are open. For  
128 the assay, each mouse was placed in the center of the maze, facing an open arm. The mouse was  
129 then allowed to freely explore the maze for 5 minutes, after which it was returned to its home cage.

130 The total time spent in the open and closed arms, as well as in the center were measured. The  
131 longer a mouse spends in the open arms, the less anxiety-like behavior it is considered to show.

132 Proportion of time spent in open arms is calculated as:

$$133 \quad \begin{aligned} & \% \text{ time in open arms} \\ & = \frac{(time \text{ spent in open arms } (s)) + 0.5 * (time \text{ spent in the middle } (s))}{300 \text{ s}} \end{aligned}$$

134 One mouse (WT) was excluded from analysis as it jumped out of the EPM during the trial.

135

### 136 **Novelty-suppressed feeding**

137 The novelty suppressed feeding (NSF) test is an assay of anxiety-like behavior in a conflict-  
138 based environment [25, 26]. Mice were fasted for 24 hours before the start of the test. Then, each  
139 mouse was placed in a grey 1.5ft X 1.5ft X 1.5ft box, in a well-lit area. At the center of the box, a  
140 fixed food pellet (standard chow) was available for the mouse to feed on. Thus, the mouse needs  
141 to choose between the anxiogenic setting of feeding in an open, well lit area as opposed to the  
142 safety of walls, but without any food availability. The mouse was allowed to explore this setting  
143 for 10 minutes and the latency to feed was measured, being careful to not include food  
144 manipulation or sniffing behaviors in this measure. The longer a mouse takes to feed, the higher  
145 its anxiety-like phenotype.

146 After this, the mouse was transferred to a quiet area, into a cage containing pre-weighed  
147 quantities of food and the amount of food they ate over a further 10-minute span was recorded.  
148 This measure assesses the hunger levels of the mice and whether differences due to the food  
149 deprivation itself influences the observations within the arena.

150 Additionally, to factor in the possibility of a general difference in appetite between KOs and  
151 WT, at the end of the NSF protocol, the mice were weighed daily for 9 days and the amount of  
152 food that they consumed was noted over these days.

153

### 154 **Novel object recognition**

155 The novel object recognition (NOR) test measures learning and memory in mice [27]. NOR  
156 involves three phases spread over two days. On the first day, each mouse was acclimatized to an



157 empty grey 1.5ft X 1.5ft X 1.5ft box by allowing it to freely explore the box for 10 minutes. On  
158 the second day, the first phase of the day is the habituation phase where the mouse was allowed to  
159 freely explore the grey box for 10 minutes. Each box contained two identical objects (25 mm tissue  
160 culture flasks filled with corn cob bedding or boxes of coverslips) placed at opposite corners of  
161 the box, 4.5 inches away from each of the two nearest walls. The mouse was then returned to its  
162 home cage. The second phase of the day is the novel object recognition phase, which tests short-  
163 term retention of recognition memory. In this phase, which starts 4 hours after the habituation  
164 phase, one of the objects in each box was exchanged for a differently shaped object (tissue culture  
165 flask as a replacement for coverslip box and vice-versa). The mouse was then allowed to freely  
166 explore the arena for 10 more minutes. The time spent exploring the two objects was separately  
167 recoded, in both phases. A mouse was considered to be involved in object exploration if its head  
168 was directed towards the object, within a radius of approximately 5 cm from it. This analysis was  
169 carried out using the TopScan 2.0 software. Mice tend to prefer exploring novel objects, over  
170 familiar objects. Hence, the exploration of the novel object is a measure of the extent to which the  
171 animal remembers the previous encounter with the familiar object. The ability to discriminate  
172 between the novel and familiar object was measured by the Discrimination Ratio (DR), calculated  
173 as:

$$174 \quad DR = \frac{\textit{Time spent exploring novel object}}{\textit{Time spent exploring familiar object}}$$

175 A DR of 1 shows a lack of discrimination between the two objects. DR > 1 shows that the  
176 mouse is exploring the novel object more than the familiar object.

177

## 178 **Morris water maze**

179       The Morris water maze (MWM) assesses spatial memory [28, 29]. The maze consists of a  
180 large circular swimming pool (diameter of 150 cm) filled with opaque water with a platform (225  
181 cm<sup>2</sup>) submerged 1 cm below the surface of the water. The mice must reach the platform in order  
182 to be able to stop swimming and rest. Spatial cues were placed on the pool walls to allow the mice  
183 to learn the location of the platform. The learning stage was 4 days long, with each day consisting  
184 of 4 trials, each with the mouse beginning at a different location in the pool. The inter-trial interval  
185 was at least 30 min. The time to reach the platform was recorded at every trial, to compare the  
186 patterns of learning. On day 5 of the experiment, the platform was removed, and the time spent in  
187 each quadrant of the pool in the span of 1 minute was recorded, to test the robustness of spatial  
188 learning (probe trial). Then, a cue trial, where the platform is placed in a new location along with  
189 a visual cue, was administered to verify that the visual system was intact in the animals. The  
190 latency to reach the platform and time spent in the appropriate quadrant in the probe trial were  
191 analyzed and calculated using HVS Image Analysis (HVS Image, Hampton, UK).

192

## 193 **Pre-pulse inhibition of acoustic startle**

194       Pre-pulse inhibition (PPI) of acoustic startle reflex is a measure of sensory-motor gating [30,  
195 31]. Testing is carried out using the SR-Lab software connected to 6 sound attenuating chambers  
196 equipped with plexiglass animal enclosure tubes (San Diego Systems, San Diego, CA, USA).  
197 These chambers are ventilated by an electrical fan that produces a constant 70 dB background.  
198 Speakers positioned directly above the enclosure present tone pulses of differing loudness and the  
199 startle of the animal is recorded by an accelerometer attached to the base of the enclosure.  
200 Following a 5-minute acclimatization period in the tube, there were 3 phases in the paradigm. In

201 the first and third phases, 6 startle pulses of 120 dB loudness and lasting for 30 msec each, were  
202 administered. In the second phase, 38 trials were administered. The first 8 trials were pulse only  
203 (startle only) trials. In the next 30 trials, the mouse received a 30 msec prepulse of 0 (pulse alone),  
204 6, 9, 12 or 15 dB intensity above the background, 100 msec prior to the actual 120 dB pulse. These  
205 pre-pulses were randomly varied across the 30 trials spaced 15 msec apart, 5 of each of the pre-  
206 pulse trials presented to the animals. The average amplitude of startle in the last 15 startle-only  
207 trials is the baseline startle. % Pre-pulse inhibition (% PPI) is calculated as:

$$208 \quad \% PPI = 100 - \frac{\textit{Startle response to trials with pre - pulse}}{\textit{Startle response to pulse alone trials}} * 100$$

209 The higher the % PPI, greater is the inhibition of acoustic startle when subjected to a low  
210 intensity sound pulse prior to the startle. In essence, a higher PPI shows higher sensorimotor  
211 gating. Two mice were excluded from this analysis (1 WT and 1 KO) for having impossibly high  
212 baseline startle levels, pointing to a recording error in the data of these mice.

213

## 214 **Statistical Analysis of Data**

215 All the data were analyzed first for homogeneity of variances as well as normality of data.  
216 The data were plotted and analyzed on GraphPad Prism, using the appropriate statistical tests. For  
217 all the tests with data distributed normally and having equal variance across the groups (WT, KO),  
218 unpaired two-tailed t-tests were used (Wheel running data, Rotarod, EPM, NSF, FST, probe and  
219 cue trials of MWM). In the cases where variances were not normal (Discrimination during NOR  
220 phase), Welch's correction was applied to the two-tailed, unpaired t-test. If the normality  
221 assumption was violated (Average startle, Average % PPI), the two-tailed Mann-Whitney test was  
222 used. For comparing between Habituation and NOR phases in the NOR task, paired, two-tailed t-  
223 tests were used. Mixed model 2-way ANOVAs were used to compare the daily consumption of

224 food and weights of the mice in the days after NSF, learning across days (MWM) and % PPI across  
225 different pre-pulse intensities (PPI). Differences were considered to be significant if  $p < 0.05$ .

## 226 **Results**

### 227 **Mice show altered activity patterns in the absence of USP2**

228 WT and *Usp2* KO mice were placed in running wheel cages and locomotor activity was  
229 recorded under a 12h:12h light:dark cycle (representative actograms in Fig 1A). *Usp2* KO mice  
230 showed a trend ( $p = 0.06$ ) for more total daily activity than WT mice (Fig 1B). Further, the duration  
231 of activity bouts was significantly longer in KO mice ( $p = 0.049$ , Fig 1C) and the average number  
232 of bouts per day was lower ( $p = 0.14$ , S1A Fig). The total counts of wheel rotation per bout of  
233 activity was also significantly increased in *Usp2* KOs, compared to WTs ( $p = 0.0481$ , S1B Fig.).  
234 Overall, these data indicated increased and less fragmented activity in mice lacking USP2. These  
235 data are consistent with those previously obtained in our laboratory [11].

236

#### 237 **Fig 1. Increased daily activity and less fragmentation of activity in *Usp2* KO mice.**

238 (A) Representative actograms for the wheel running activity of WT and *Usp2* KO mice  
239 over 10 days under a 12h:12h light:dark cycle. (B, C) Quantification, averaged over the  
240 10 days, of the total daily activity (B) and the average bout length (C). Individual data  
241 points represent independent mice and data are represented as mean  $\pm$  SEM. Unpaired  
242 two-tailed t-tests, \*:  $p < 0.05$ .

243

### 244 **Motor coordination is reduced in mice lacking USP2**

245 The increased activity and reduced fragmentation in running wheels led us to wonder if this  
246 phenotype could be the result of a change in motor coordination in the *Usp2* KO mice. To assay  
247 this, mice were subjected to the rotarod protocol, which assesses motor coordination and balance

248 by evaluating the ability of the mouse to stay on top of a rotating cylinder. *Usp2* KO mice spent  
249 significantly less time ( $p = 0.02$ ) on the accelerating cylinder ( $p = 0.02$ , Fig 2) and fell from the  
250 cylinder at a lower speed (WT:  $18.11 \pm 1.35$  rpm, KO:  $13.94 \pm 1.31$  rpm,  $p = 0.038$ ) compared to  
251 WT mice, pointing towards a reduction of motor coordination in mice lacking USP2. Hence, a  
252 change in motor coordination does not seem to explain the increased activity phenotype seen in  
253 the running wheel experiments.

254

255 **Fig 2. Reduced motor coordination of *Usp2* KO mice.** Measurement of time spent on  
256 the accelerating rotarod by WT and *Usp2* KO mice. Individual data points represent  
257 independent mice and data are represented as mean  $\pm$  SEM. Unpaired two-tailed t-tests,  
258 \*:  $p < 0.05$ .

259

## 260 **Anxiety-like behavior is decreased in mice lacking USP2**

261 We surveyed *Usp2* gene expression in the mouse brain expression database in the Allen  
262 Mouse Brain Atlas (<https://mouse.brain-map.org/experiment/show?id=76098316>) [20]. As shown  
263 in Table 1, *Usp2* is expressed throughout the brain. Therefore, we subjected the WT and *Usp2* KO  
264 mice to a battery of tests for affective and cognitive behaviors.

265

266 **Table 1. Relative expression of *Usp2* transcript in the mouse brain**

| Brain region   | <i>Usp2</i> expression level * |
|----------------|--------------------------------|
| Isocortex      | +++++                          |
| Olfactory bulb | +++                            |
| Hippocampus    | ++++                           |

|                    |       |
|--------------------|-------|
| Striatum           | +++++ |
| Thalamus           | +++   |
| Hypothalamus       | +     |
| Midbrain           | +     |
| Pons               | +     |
| Cortical sub-plate | +++++ |
| Pallidum           | ++    |
| Medulla            | +     |
| Cerebellum         | ++    |

267 \* Relative expression from in situ hybridization data for *Usp2*, in the Allen mouse brain  
268 atlas (each '+' sign represents ~1 unit of raw expression value).

269

270 Expression of the gene in regions such as the hippocampus and cortex, which are associated  
271 with anxiety-like behavior [32], prompted us to assess such behavior, using the Elevated Plus Maze  
272 (EPM) and the Novelty-suppressed Feeding (NSF) test.

273 The EPM assay builds on the natural aversion of mice to heights and open spaces,  
274 counterbalanced by their drive to explore novel surroundings. When subjected to the EPM, *Usp2*  
275 KO mice exhibited a trend towards reduced anxiety-like phenotypes compared to WT mice: they  
276 spent a greater proportion of time in the open arms as compared to the WTs ( $p = 0.09$ , Fig 3A).  
277 The latency to enter open arms, on the other hand, did not differ significantly between genotypes  
278 (WT:  $34.67 \pm 29.7$  s, KO:  $18.23 \pm 5.98$  s, Mann-Whitney test  $p = 0.2275$ ).

279

280 **Fig 3. Reduced anxiety-like behavior in *Usp2* KO mice.** (A) Proportion of time spent  
281 in the open arms in the elevated plus maze (EPM). (B) Latency to the start feeding in the

282 testing arena of the novelty-suppressed feeding (NSF) test. (C) Food consumed over 9  
283 days following the NSF test. Individual data points represent independent mice and data  
284 are represented as mean  $\pm$  SEM. Two-way ANOVA (C) or unpaired two-tailed t-tests (A,  
285 B, D), \*\*:  $p < 0.01$ .

286

287 The NSF test opposes the desire for safety with the desire to feed. The *Usp2* KO mice started  
288 feeding faster than the WT mice ( $p = 0.0046$ , Fig 3B). When feeding was assayed in home cages  
289 right after the test, for 10 minutes, all mice ate equally ( $p = 0.882$ , S2A Fig). To verify if the  
290 increased latency to feed was a result of metabolic changes, or changes in hunger, mice were  
291 weighed daily, and their daily food consumption was measured. There were no differences  
292 between WT and KO mice in their general appetite, as both genotypes consumed equal amounts  
293 of food over the span of a week ( $F(8, 120) = 1.63$ ,  $p = 0.1232$ , Fig 3C). Similarly, there were no  
294 differences in the weights of the mice recorded over a 9-day span ( $F(4, 60) = 0.1$ ,  $p = 0.9812$ , Fig  
295 S2B). Thus, the observed phenotype of an increased latency to feed reflects mainly on a decrease  
296 in the anxiety-like behavior in mice lacking the *Usp2* gene, consistent with the trend observed in  
297 the EPM test results.

298

## 299 **Recognition memory, but not spatial memory, is attenuated in mice** 300 **lacking USP2**

301 Since *Usp2* is highly expressed in the cortex and hippocampus, we questioned whether  
302 knocking it out would result in effects on short-term recognition memory [33]. In the NOR test,  
303 WT mice had a higher DR in the NOR phase of the test ( $p = 0.08$ , Fig 4A). On the other hand, for  
304 the *Usp2* KO mice, the DR is unchanged between the habituation and NOR phases ( $p = 0.916$ , Fig



305 4B). Comparison between the discrimination ratios of WT and KO mice showed that the KOs had  
306 a significantly lower ability to distinguish novel objects ( $p = 0.032$ , Fig 4C). Therefore, recognition  
307 memory is impaired in mice lacking *Usp2*.

308

309 **Fig 4. Impaired object recognition learning and memory in *Usp2* KO mice.** (A, B)

310 Proportion of time spent by WT mice (A) or *Usp2* KO mice (B) to explore the novel  
311 object compared to the familiar object (discrimination ratio). (C) Comparison of the  
312 discrimination ratios of the WT and KO mice during the novel object recognition phase.

313 Paired, two-tailed t-tests (A, B) or unpaired two-tailed t-tests with Welch's correction (C),

314 \*:  $p < 0.05$ .

315

316 We also tested for spatial memory using the Morris water maze (MWM). Learning was  
317 observed in all the mice, over the first 4 days ( $F(3, 45) = 12.71$ ,  $p < 0.0001$ ) (Fig 5A). In the probe  
318 trial, both genotypes of mice spent more than 25% of the test time in the appropriate quadrant  
319 (WT:  $p = 0.051$ , KO:  $p = 0.055$ , Fig 5B), suggesting that the mice had learnt the position of the  
320 platform. In the cue trial, all the mice were equally adept at finding the platform at a new location  
321 ( $p = 0.9235$ , Fig 5C), confirming that performance factors unrelated to place learning were not  
322 involved in the probe trial results. However, in all these procedures, no differences were found  
323 between the WT and *Usp2* KO mice.

324

325 **Fig 5. Unaltered spatial learning and memory of *Usp2* KO mice.** (A) Time taken by

326 the mice to find the platform on subsequent days, as a proxy for learning. (B) Probe trial:

327 Proportion of time spent in the target quadrant in the absence of the platform on day 5.

328 (C) Cue trial: Time taken by the mice to find the platform at a new location. Individual  
329 data points represent independent mice and data are represented as mean  $\pm$  SEM. Two-  
330 way ANOVA (A) or unpaired two-tailed t-tests and one sample t-test (B, C), \*\*\*\*:  $p <$   
331 0.0001 for effect of time in (A), interaction and effect of genotype n.s.

332

### 333 **Effects on sensorimotor gating in mice lacking USP2**

334 *Usp2* expression is high in the olfactory bulb, striatum and prefrontal cortex, which are  
335 associated with sensorimotor gating [34–36]. Hence, we tested for pre-pulse inhibition (PPI) of  
336 acoustic startle in *Usp2* KO mice. There was no difference between the genotypes in their baseline  
337 startle response to a 120 dB startle pulse (Fig 6A). The % PPI averaged across the different pre-  
338 pulse intensities were not different between the genotypes ( $p = 0.285$ , Fig 6B). However, when the  
339 % PPI data were analyzed separately for each pre-pulse intensity, a Genotype x Pre-pulse intensity  
340 interaction was seen ( $F(3, 63) = 2.79$ ,  $p = 0.043$ , Fig 6C). A simple main effect analysis revealed  
341 a trend for a difference between genotypes for a 12 dB pre-pulse intensity ( $p = 0.06$ ). This  
342 suggested that *Usp2* may affect sensorimotor gating.

343

344 **Fig 6. Reduced sensorimotor gating in *Usp2* KO mice.** (A) Amplitude of baseline  
345 startle when a 120 dB pulse is given in the absence of any pre-pulse. (B) Percent pre-  
346 pulse inhibition (% PPI) when any non-zero intensity of pre-pulse was administered. (C)  
347 % PPI in response to the different intensities of pre-pulse. Individual data points represent  
348 independent mice and data are represented as mean  $\pm$  SEM. Two-way ANOVA (C) or  
349 two-tailed Mann-Whitney test (A, B), \*:  $p < 0.05$  for the interaction in (C).

## 350 **Discussion**

351 In this report, we present evidence for a role of the deubiquitinating enzyme USP2 in the  
352 central nervous system. More specifically, we have uncovered alterations of anxiety-like behavior,  
353 learning and memory, and motor coordination in mice with a deletion in the *Usp2* gene. This work  
354 represents, to our knowledge, the first characterization of behaviors in the absence of USP2  
355 function, beyond its established role in the regulation of circadian rhythms.

356 USP2 is a well-studied DUB with multiple established functions. The first known substrate  
357 of USP2 was the fatty acid synthase protein (FAS). In 2004, Graner and colleagues showed that  
358 USP2 binds to and stabilizes FAS [37], a protein known to be upregulated in many cancers  
359 including prostate cancer [38]. USP2 was shown to be involved in regulating the degradation of  
360 oncogene p53 by targeting the ubiquitin ligase Mdm2 [39]. MdmX, another target of Mdm2, is  
361 also deubiquitinated by USP2. Further, USP2 controls the cell cycle by deubiquitinating Aurora-  
362 A, a centrosomal kinase required for mitosis [40], as well as cyclins such as cyclin A1 and cyclin  
363 D [41–43], which are regulators of meiosis. Hence, unsurprisingly, the dysregulation of USP2  
364 levels was associated with the development of various kinds of cancers, such as colorectal cancer  
365 [42], prostate cancer [41] and oral squamous cell carcinoma [44]. In the circadian system, USP2  
366 regulates the ubiquitination of several clock proteins and contributes to the response of the  
367 circadian clock to light [11–14]. Apart from its functions within the clock, USP2 also mediates  
368 clock output. For instance, USP2 regulates the membrane scaffolding protein NHERF, in a  
369 circadian manner [45]. NHERF, in turn, regulates cellular homeostasis of calcium absorption in a  
370 clock-dependent manner [45], hence making USP2 a clock output mediator.

371 While several functions of USP2 have been uncovered, little is known about its possible  
372 roles in the central nervous system. Based on data from the Allen Mouse Brain Atlas, *Usp2* gene

373 is expressed in various brain regions (Table 1), which suggests that this DUB could be regulating  
374 behavioral processes. We addressed this using a battery of tests aimed at assaying various  
375 behaviors. This was initially prompted by our analyses of wheel-running behavior, in which we  
376 noted increased daily activity and a more consolidated activity pattern in *Usp2* KO mice. The  
377 reduction in activity fragmentation could be the result of an effect of the *Usp2* KO on the circadian  
378 system but our prior work using constant conditions, where limited effects on the endogenous  
379 period of the rhythms were found, argues against this. Thus, we used the rotarod to check a possible  
380 impact of *Usp2* gene deletion on motor coordination: the decrease in motor coordination of the  
381 KO mice suggests that this is also not the source of the altered activity patterns in mice lacking  
382 *Usp2*. Another possible source for this phenotype could be in the light-response pathways;  
383 however, the increased activity and consolidation is seen not only in the light phase of the 12:12LD  
384 cycle but also in the night, which suggests that an alteration of the light-response pathways (e.g.  
385 reduced masking of activity by light) is not involved. Finally, running wheel activity being a  
386 motivated behavior [46, 47], the phenotype in these assays could be due to changes in the reward  
387 pathways in the KO mice [48, 49]. Indeed, *Usp2* is highly expressed in the striatum (Table 1).  
388 Therefore, although we have not tested the *Usp2* KO mice for reward behaviors, this could  
389 represent an interesting avenue for future research.

390 The hippocampus and the cortex show the highest levels of *Usp2* expression. These are  
391 regions associated with the control of anxiety-like behavior. Accordingly, we found a decrease in  
392 anxiety-like behavior in mice lacking *Usp2*, both in the EPM and the NSF tests. In the former, the  
393 mice lacking *Usp2* spent more time in the open arms than their WT littermates, showing a  
394 reduction in anxiety-like behavior. In line with these findings, in the NSF test (which is a more  
395 sensitive measure of anxiety-like behavior, due to the pressure to feed), the mice lacking *Usp2* fed

396 significantly quicker than the WT mice, reiterating the reduction in anxiety-like behavior in mice  
397 lacking USP2.

398 Further exploring the effects of cortical and hippocampal expression of *Usp2*, we looked at  
399 the effects its deletion might have on cognition. In the NOR test, the KOs showed no distinction  
400 in interacting with the novel and the familiar object (DR of 1 in both, the habituation and NOR  
401 phases), pointing to a deficit in either the learning of the two objects or to the lack of short-term  
402 memory retention. On the other hand, the MWM test showed that spatial learning and memory  
403 were intact in the *Usp2* KO mice. Interestingly, a prior study has shown a correlation between a  
404 reduction of spatial memory in rats following stress with a downregulation of USP2 protein levels  
405 in the hippocampus, both reductions being concomitantly rescued by treatment with retigabine, an  
406 opener of Kv7 potassium channels [50]. This suggested that USP2 might play a role in spatial  
407 memory, at least under stress conditions, in rats. On the contrary, our data indicate no role for  
408 USP2 in spatial memory in mice under basal, unchallenged conditions.

409 Finally, using the PPI test, we looked at sensorimotor gating, or the ability of sensory inputs  
410 to guide motor responses in the organism. This behavior is guided by the striatum and olfactory  
411 bulbs, where the expression of *Usp2* is high as well. There seemed to be an effect of genotype on  
412 the startle response, but not at all pre-pulse intensities. Thus, further work will be required to  
413 delineate the effects of USP2 on sensorimotor gating.

414 In conclusion, our data indicate that *Usp2* plays a role not only in the circadian system, but  
415 also in controlling various other behaviors such as anxiety-like phenotypes, motor coordination  
416 and short-term memory retention. A limitation of our study is that it does not provide insights on  
417 what might be the substrates of USP2 in the brain regions where it is highly expressed. It will be  
418 important in the future to find what these substrates are, and how USP2 action on these proteins

419 can lead to behavioral alterations like the ones we have observed in this study. Nevertheless, this  
420 report sets the stage for the study of the roles of USP2 in the central nervous system, and shows  
421 that this deubiquitinase has many roles beyond those already described in peripheral organs.

## 422 **Acknowledgements**

423 We thank all the members of the Cermakian lab for discussions. We thank Tara Delorme,  
424 Marie-Eve Cloutier, Geneviève Dubeau Laramée, Christine Kirady and Adeline Rachalski for  
425 technical help and for assistance in the behavioral experiments; Joseph Rochford, Lalit K.  
426 Srivastava and Eve-Marie Charbonneau for advice on the behavioral tests; Joseph Rochford for a  
427 critical review of the manuscript; Yu Ding and William Ozell-Landry for data analysis; Simon S.  
428 Wing and Nathalie Bédard for advice and technical help with the *Usp2* KO mice.

429

## 430 **References**

- 431 [1] Mukhopadhyay D, Riezman H. Proteasome-independent functions of ubiquitin in  
432 endocytosis and signaling. *Science* 2007; 315: 201–5.
- 433 [2] Zheng N, Shabek N. Ubiquitin Ligases: Structure, Function, and Regulation. *Annu Rev*  
434 *Biochem* 2017; 86: 129–157.
- 435 [3] Ardley HC, Robinson PA. E3 ubiquitin ligases. *Essays in Biochemistry* 2005; 41: 15–30.
- 436 [4] Oishi K, Miyazaki K, Kadota K, et al. Genome-wide Expression Analysis of Mouse Liver  
437 Reveals CLOCK-regulated Circadian Output Genes. *J Biol Chem* 2003; 278: 41519–41527.
- 438 [5] Storch KF, Lipan O, Leykin I, et al. Extensive and divergent circadian gene expression in  
439 liver and heart. *Nature* 2002; 417: 78–83.
- 440 [6] Gousseva N, Baker RT. Gene Structure, Alternate Splicing, Tissue Distribution, Cellular  
441 Localization, and Developmental Expression Pattern of Mouse Deubiquitinating Enzyme  
442 Isoforms Usp2-45 and Usp2-69. *Gene Expr* 2003; 11: 163–179.
- 443 [7] Yan J, Wang H, Liu Y, et al. Analysis of gene regulatory networks in the mammalian

- 444 circadian rhythm. *PLoS Comput Biol* 2008; 4: e1000193.
- 445 [8] Zhang R, Lahens NF, Ballance HI, et al. A circadian gene expression atlas in mammals:  
446 Implications for biology and medicine. *Proc Natl Acad Sci U S A* 2014; 111: 16219–16224.
- 447 [9] Dibner C, Schibler U, Albrecht U. The Mammalian Circadian Timing System: Organization  
448 and Coordination of Central and Peripheral Clocks. *Annu Rev Physiol* 2010; 72: 517–549.
- 449 [10] Srikanta SB, Cermakian N. To Ub or not to Ub: Regulation of circadian clocks by  
450 ubiquitination and deubiquitination. *J Neurochem* 2020; jnc.15132.
- 451 [11] Yang Y, Duguay D, Bédard N, et al. Regulation of behavioral circadian rhythms and clock  
452 protein PER1 by the deubiquitinating enzyme USP2. *Biol Open* 2012; 1: 789–801.
- 453 [12] Scoma HD, Humby M, Yadav G, et al. The De-Ubiquitylating Enzyme, USP2, Is  
454 Associated with the Circadian Clockwork and Regulates Its Sensitivity to Light. *PLoS One*  
455 2011; 6: e25382.
- 456 [13] Tong X, Buelow K, Guha A, et al. USP2a protein deubiquitinates and stabilizes the  
457 circadian protein CRY1 in response to inflammatory signals. *J Biol Chem* 2012; 287:  
458 25280–25291.
- 459 [14] Yang Y, Duguay D, Fahrenkrug J, et al. USP2 regulates the intracellular localization of  
460 PER1 and circadian gene expression. *J Biol Rhythms* 2014; 29: 243–256.
- 461 [15] Kushima I, Aleksic B, Ito Y, et al. Association study of ubiquitin-specific peptidase 46  
462 (USP46) with bipolar disorder and schizophrenia in a Japanese population. *J Hum Genet*  
463 2010; 55: 133–136.
- 464 [16] Ryan MM, Lockstone HE, Huffaker SJ, et al. Gene expression analysis of bipolar disorder  
465 reveals downregulation of the ubiquitin cycle and alterations in synaptic genes. *Mol*  
466 *Psychiatry* 2006; 11: 965–978.



- 467 [17] Chen X, Wang X, Sun C, et al. FBXL21 association with schizophrenia in irish family and  
468 case-control samples. *Am J Med Genet Part B Neuropsychiatr Genet* 2008; 147B: 1231–  
469 1237.
- 470 [18] Shi S, Bichell TJ, Ihrle RA, et al. Ube3a imprinting impairs circadian robustness in  
471 Angelman syndrome models. *Curr Biol* 2015; 25: 537–45.
- 472 [19] McNaught KSP, Olanow CW, Halliwell B, et al. Failure of the ubiquitin–proteasome  
473 system in Parkinson’s disease. *Nat Rev Neurosci* 2001; 2: 589–594.
- 474 [20] Lein ES, Hawrylycz MJ, Ao N, et al. Genome-wide atlas of gene expression in the adult  
475 mouse brain. *Nature* 2007; 445: 168–176.
- 476 [21] Bedard N, Yang Y, Gregory M, et al. Mice Lacking the USP2 Deubiquitinating Enzyme  
477 Have Severe Male Subfertility Associated with Defects in Fertilization and Sperm Motility.  
478 *Biol Reprod* 2011; 85: 594–604.
- 479 [22] Yoo SH, Yamazaki S, Lowrey PL, et al. PERIOD2::LUCIFERASE real-time reporting of  
480 circadian dynamics reveals persistent circadian oscillations in mouse peripheral tissues.  
481 *Proc Natl Acad Sci U S A* 2004; 101: 5339–5346.
- 482 [23] Jones BJ, Roberts DJ. The quantiative measurement of motor inco-ordination in naive mice  
483 using an acelerating rotarod. *J Pharm Pharmacol* 1968; 20: 302–4.
- 484 [24] Walf AA, Frye CA. The use of the elevated plus maze as an assay of anxiety-related  
485 behavior in rodents. *Nat Protoc* 2007; 2: 322–8.
- 486 [25] Bodnoff SR, Suranyi-Cadotte B, Aitken DH, et al. The effects of chronic antidepressant  
487 treatment in an animal model of anxiety. *Psychopharmacology (Berl)* 1988; 95: 298–302.
- 488 [26] Shephard RA, Broadhurst PL. Hyponeophagia and arousal in rats: Effects of diazepam, 5-  
489 methoxy-N,N-dimethyltryptamine, d-amphetamine and food deprivation.

- 490 *Psychopharmacology (Berl)* 1982; 78: 368–372.
- 491 [27] Şik A, Van Nieuwehuyzen P, Prickaerts J, et al. Performance of different mouse strains in  
492 an object recognition task. *Behav Brain Res* 2003; 147: 49–54.
- 493 [28] Barnhart CD, Yang D, Lein PJ. Using the Morris water maze to assess spatial learning and  
494 memory in weanling mice. *PLoS One* 2015; 10: e0124521.
- 495 [29] Vorhees C V., Williams MT. Morris water maze: Procedures for assessing spatial and  
496 related forms of learning and memory. *Nat Protoc* 2006; 1: 848–858.
- 497 [30] Bhardwaj SK, Stojkovic K, Kiessling S, et al. Constant light uncovers behavioral effects of  
498 a mutation in the schizophrenia risk gene *Dtnbp1* in mice. *Behav Brain Res* 2015; 284: 58–  
499 68.
- 500 [31] Shoji H, Miyakawa T. Relationships between the acoustic startle response and prepulse  
501 inhibition in C57BL/6J mice: A large-scale meta-analytic study. *Mol Brain* 2018; 11: 42.
- 502 [32] Adhikari A, Topiwala MA, Gordon JA. Synchronized Activity between the Ventral  
503 Hippocampus and the Medial Prefrontal Cortex during Anxiety. *Neuron* 2010; 65: 257–269.
- 504 [33] Dunnett SB, Wareham AT, Torres EM. Cholinergic blockade in prefrontal cortex and  
505 hippocampus disrupts short-term memory in rats. *Neuroreport* 1990; 1: 61–64.
- 506 [34] Rompala GR, Zsiros V, Zhang S, et al. Contribution of NMDA Receptor Hypofunction in  
507 Prefrontal and Cortical Excitatory Neurons to Schizophrenia-Like Phenotypes. *PLoS One*  
508 2013; 8: e61278.
- 509 [35] Mitazaki S, Nakagawasai O, Onogi H, et al. Role of prefrontal cortical 5-HT<sub>2A</sub> receptors  
510 and serotonin transporter in the behavioral deficits in post-pubertal rats following neonatal  
511 lesion of the ventral hippocampus. *Behav Brain Res*; 377. Epub ahead of print 13 January  
512 2020. DOI: 10.1016/j.bbr.2019.112226.

- 513 [36] Niu H, He X, Zhou T, et al. Neural circuits containing olfactory neurons are involved in the  
514 prepulse inhibition of the startle reflex in rats. *Front Behav Neurosci* 2015; 9: 74.
- 515 [37] Graner E, Tang D, Rossi S, et al. The isopeptidase USP2a regulates the stability of fatty  
516 acid synthase in prostate cancer. *Cancer Cell* 2004; 5: 253–61.
- 517 [38] Swinnen J V., Vanderhoydonc F, Elgamal AA, et al. Selective activation of the fatty acid  
518 synthesis pathway in human prostate cancer. *Int J cancer* 2000; 88: 176–9.
- 519 [39] Stevenson LF, Sparks A, Allende-Vega N, et al. The deubiquitinating enzyme USP2a  
520 regulates the p53 pathway by targeting Mdm2. *EMBO J* 2007; 26: 976–986.
- 521 [40] Shi Y, Solomon LR, Pereda-Lopez A, et al. Ubiquitin-specific cysteine protease 2a (USP2a)  
522 regulates the stability of Aurora-A. *J Biol Chem* 2011; 286: 38960–8.
- 523 [41] Kim J, Kim WJ, Liu Z, et al. The ubiquitin-specific protease USP2a enhances tumor  
524 progression by targeting cyclin A1 in bladder cancer. *Cell Cycle* 2012; 11: 1123–1130.
- 525 [42] Davis MI, Pragani R, Fox JT, et al. Small molecule inhibition of the ubiquitin-specific  
526 protease USP2 accelerates cyclin D1 degradation and leads to cell cycle arrest in colorectal  
527 cancer and mantle cell lymphoma models. *J Biol Chem* 2016; 291: 24628–24640.
- 528 [43] Shan J, Zhao W, Gu W. Suppression of cancer cell growth by promoting cyclin D1  
529 degradation. *Mol Cell* 2009; 36: 469–76.
- 530 [44] Silva SD da, Cunha IW, Nishimoto IN, et al. Clinicopathological significance of ubiquitin-  
531 specific protease 2a (USP2a), fatty acid synthase (FASN), and ErbB2 expression in oral  
532 squamous cell carcinomas. *Oral Oncol* 2009; 45: e134–e139.
- 533 [45] Pouly D, Chenaux S, Martin V, et al. USP2-45 is a circadian clock output effector regulating  
534 calcium absorption at the post- Translational level. *PLoS One* 2016; 11: 1–19.
- 535 [46] Meijer JH, Robbers Y. Wheel running in the wild. *Proceedings Biol Sci*; 281. Epub ahead

- 536 of print 7 July 2014. DOI: 10.1098/rspb.2014.0210.
- 537 [47] Salamone JD, Correa M. The Mysterious Motivational Functions of Mesolimbic Dopamine.  
538 *Neuron* 2012; 76: 470–485.
- 539 [48] Grigsby KB, Kovarik CM, Rottinghaus GE, et al. High and low nightly running behavior  
540 associates with nucleus accumbens N-Methyl-d-aspartate receptor (NMDAR) NR1 subunit  
541 expression and NMDAR functional differences. *Neurosci Lett* 2018; 671: 50–55.
- 542 [49] Rhodes JS, Garland T, Gammie SC. Patterns of brain activity associated with variation in  
543 voluntary wheel-running behavior. *Behav Neurosci* 2003; 117: 1243–56.
- 544 [50] Li C, Zhang J, Xu H, et al. Retigabine ameliorates acute stress-induced impairment of  
545 spatial memory retrieval through regulating USP2 signaling pathways in hippocampal CA1  
546 area. *Neuropharmacology* 2018; 135: 151–162.
- 547
- 548

## 549 **Supporting information**

550

551 **S1 Fig. Locomotor activity patterns of *Usp2* KO mice.** Quantification averaged over 10  
552 days of number of bouts of activity per day (A) and number of wheel rotations per activity  
553 bout (B). Individual data points represent independent mice and data are represented as mean  
554  $\pm$  SEM. Unpaired two-tailed t-tests, \*  $p < 0.05$ .

555

556 **S2 Fig. Control measures of novelty-suppressed feeding (NSF) test.** (A) Quantity of food  
557 consumed within 10 minutes post-NSF test, in the home cage. (B) Weight of the mice over  
558 9 days following the NSF test. Individual data points represent independent mice and data  
559 are represented as mean  $\pm$  SEM. Unpaired two-tailed t-tests (A) or two-way ANOVA (B),  
560 all n.s.

561

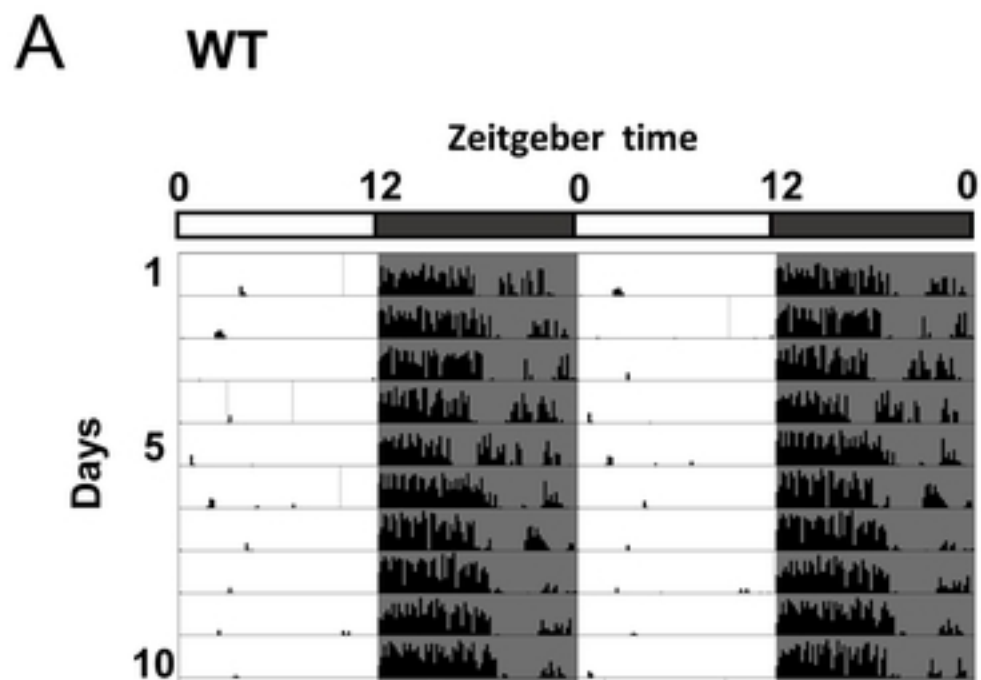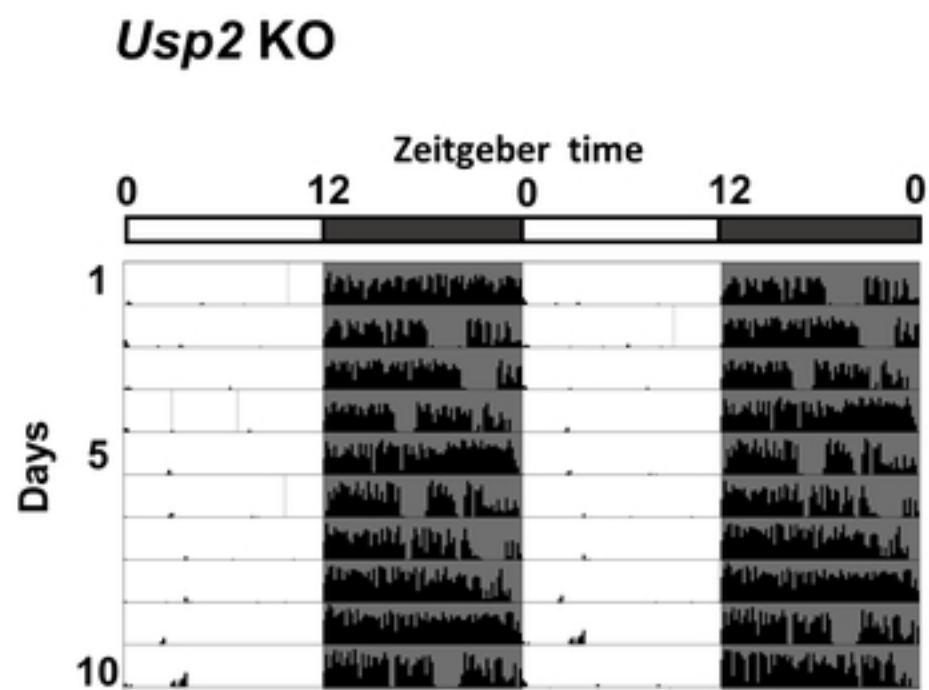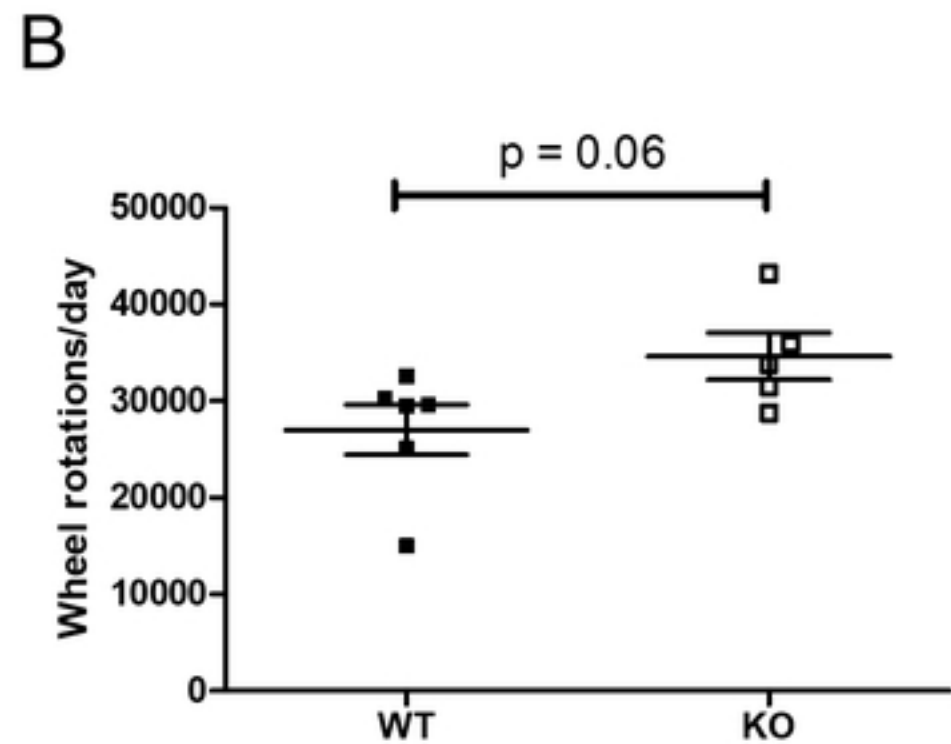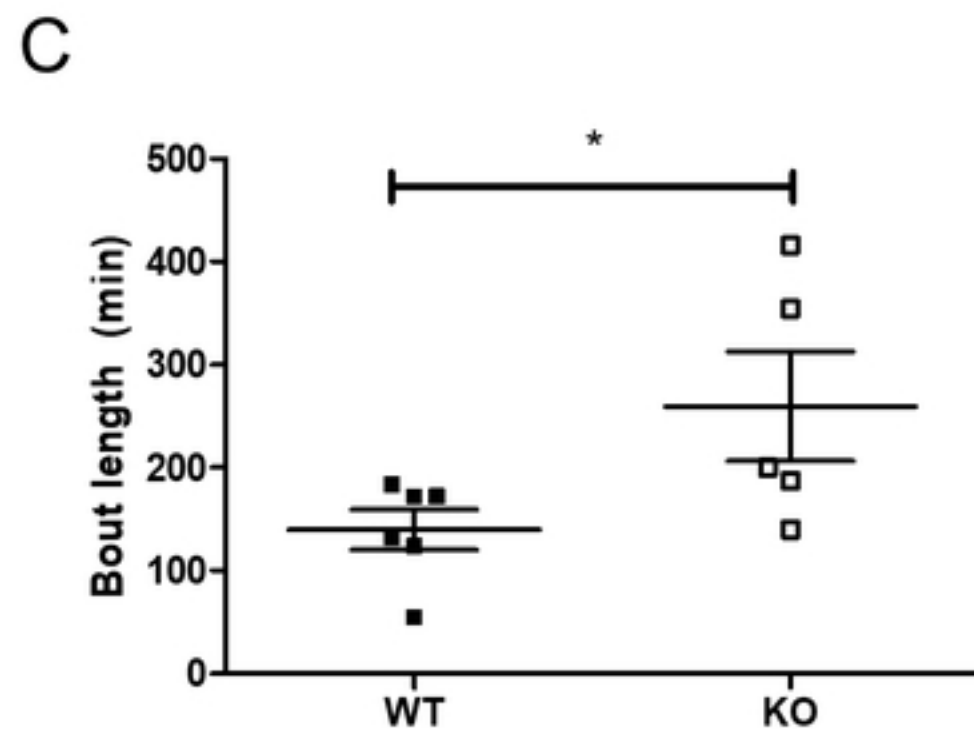

Figure 1

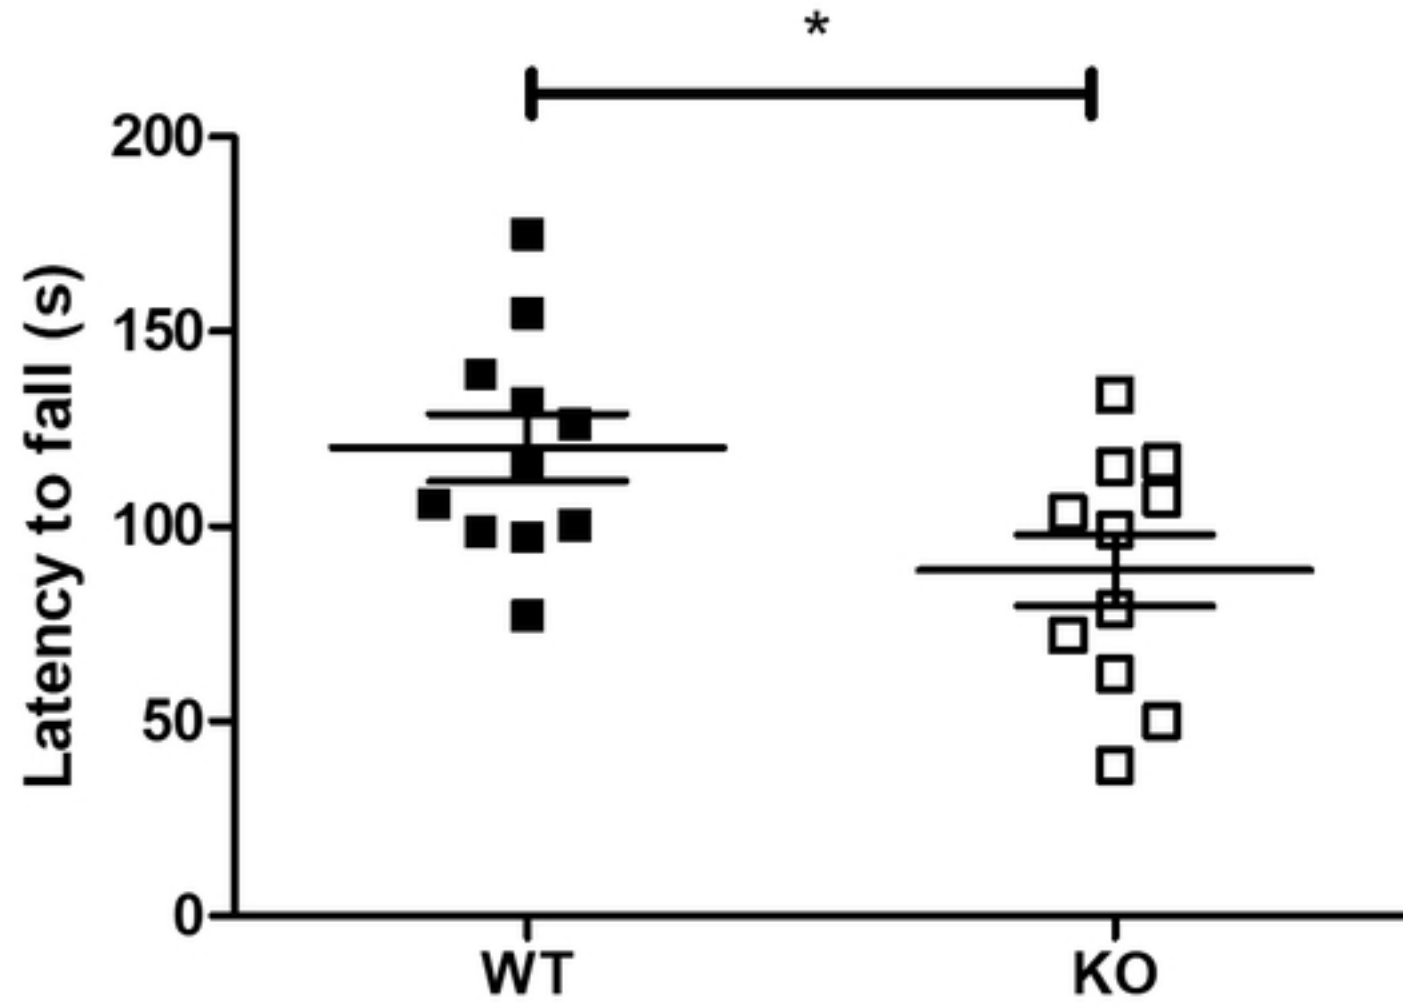

Figure 2

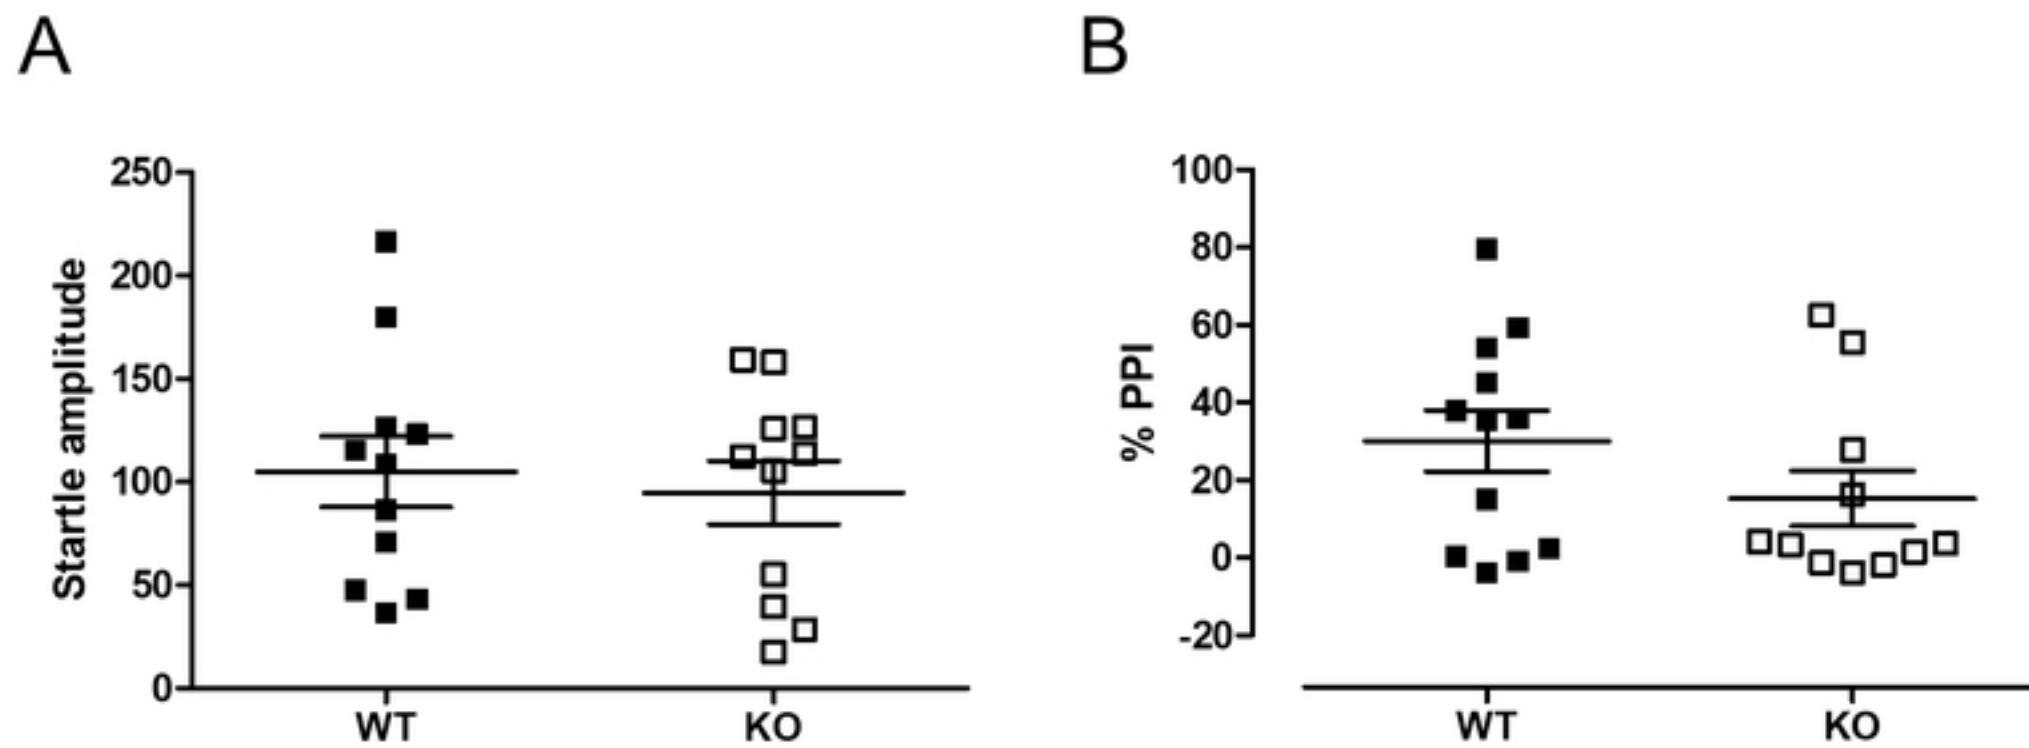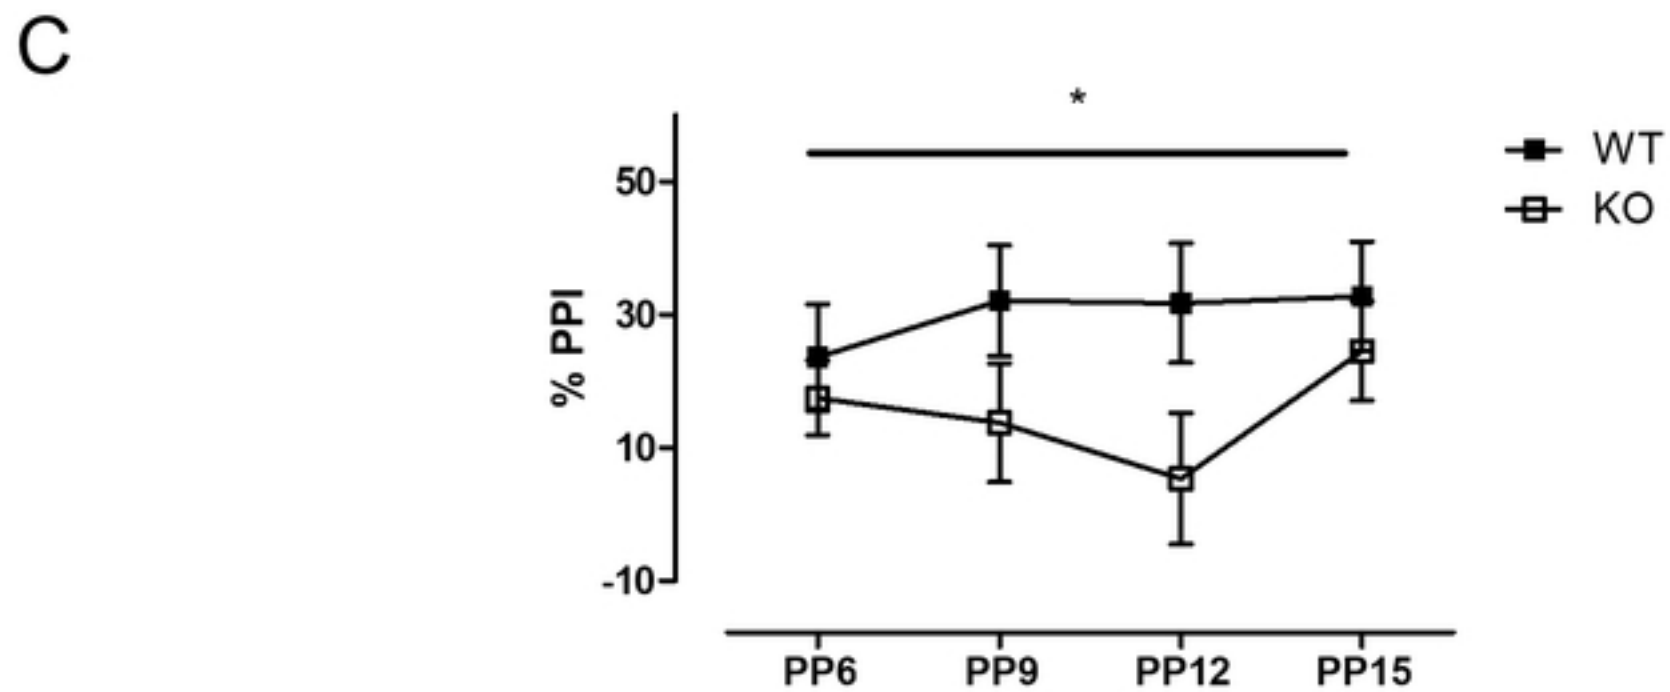

Figure 6



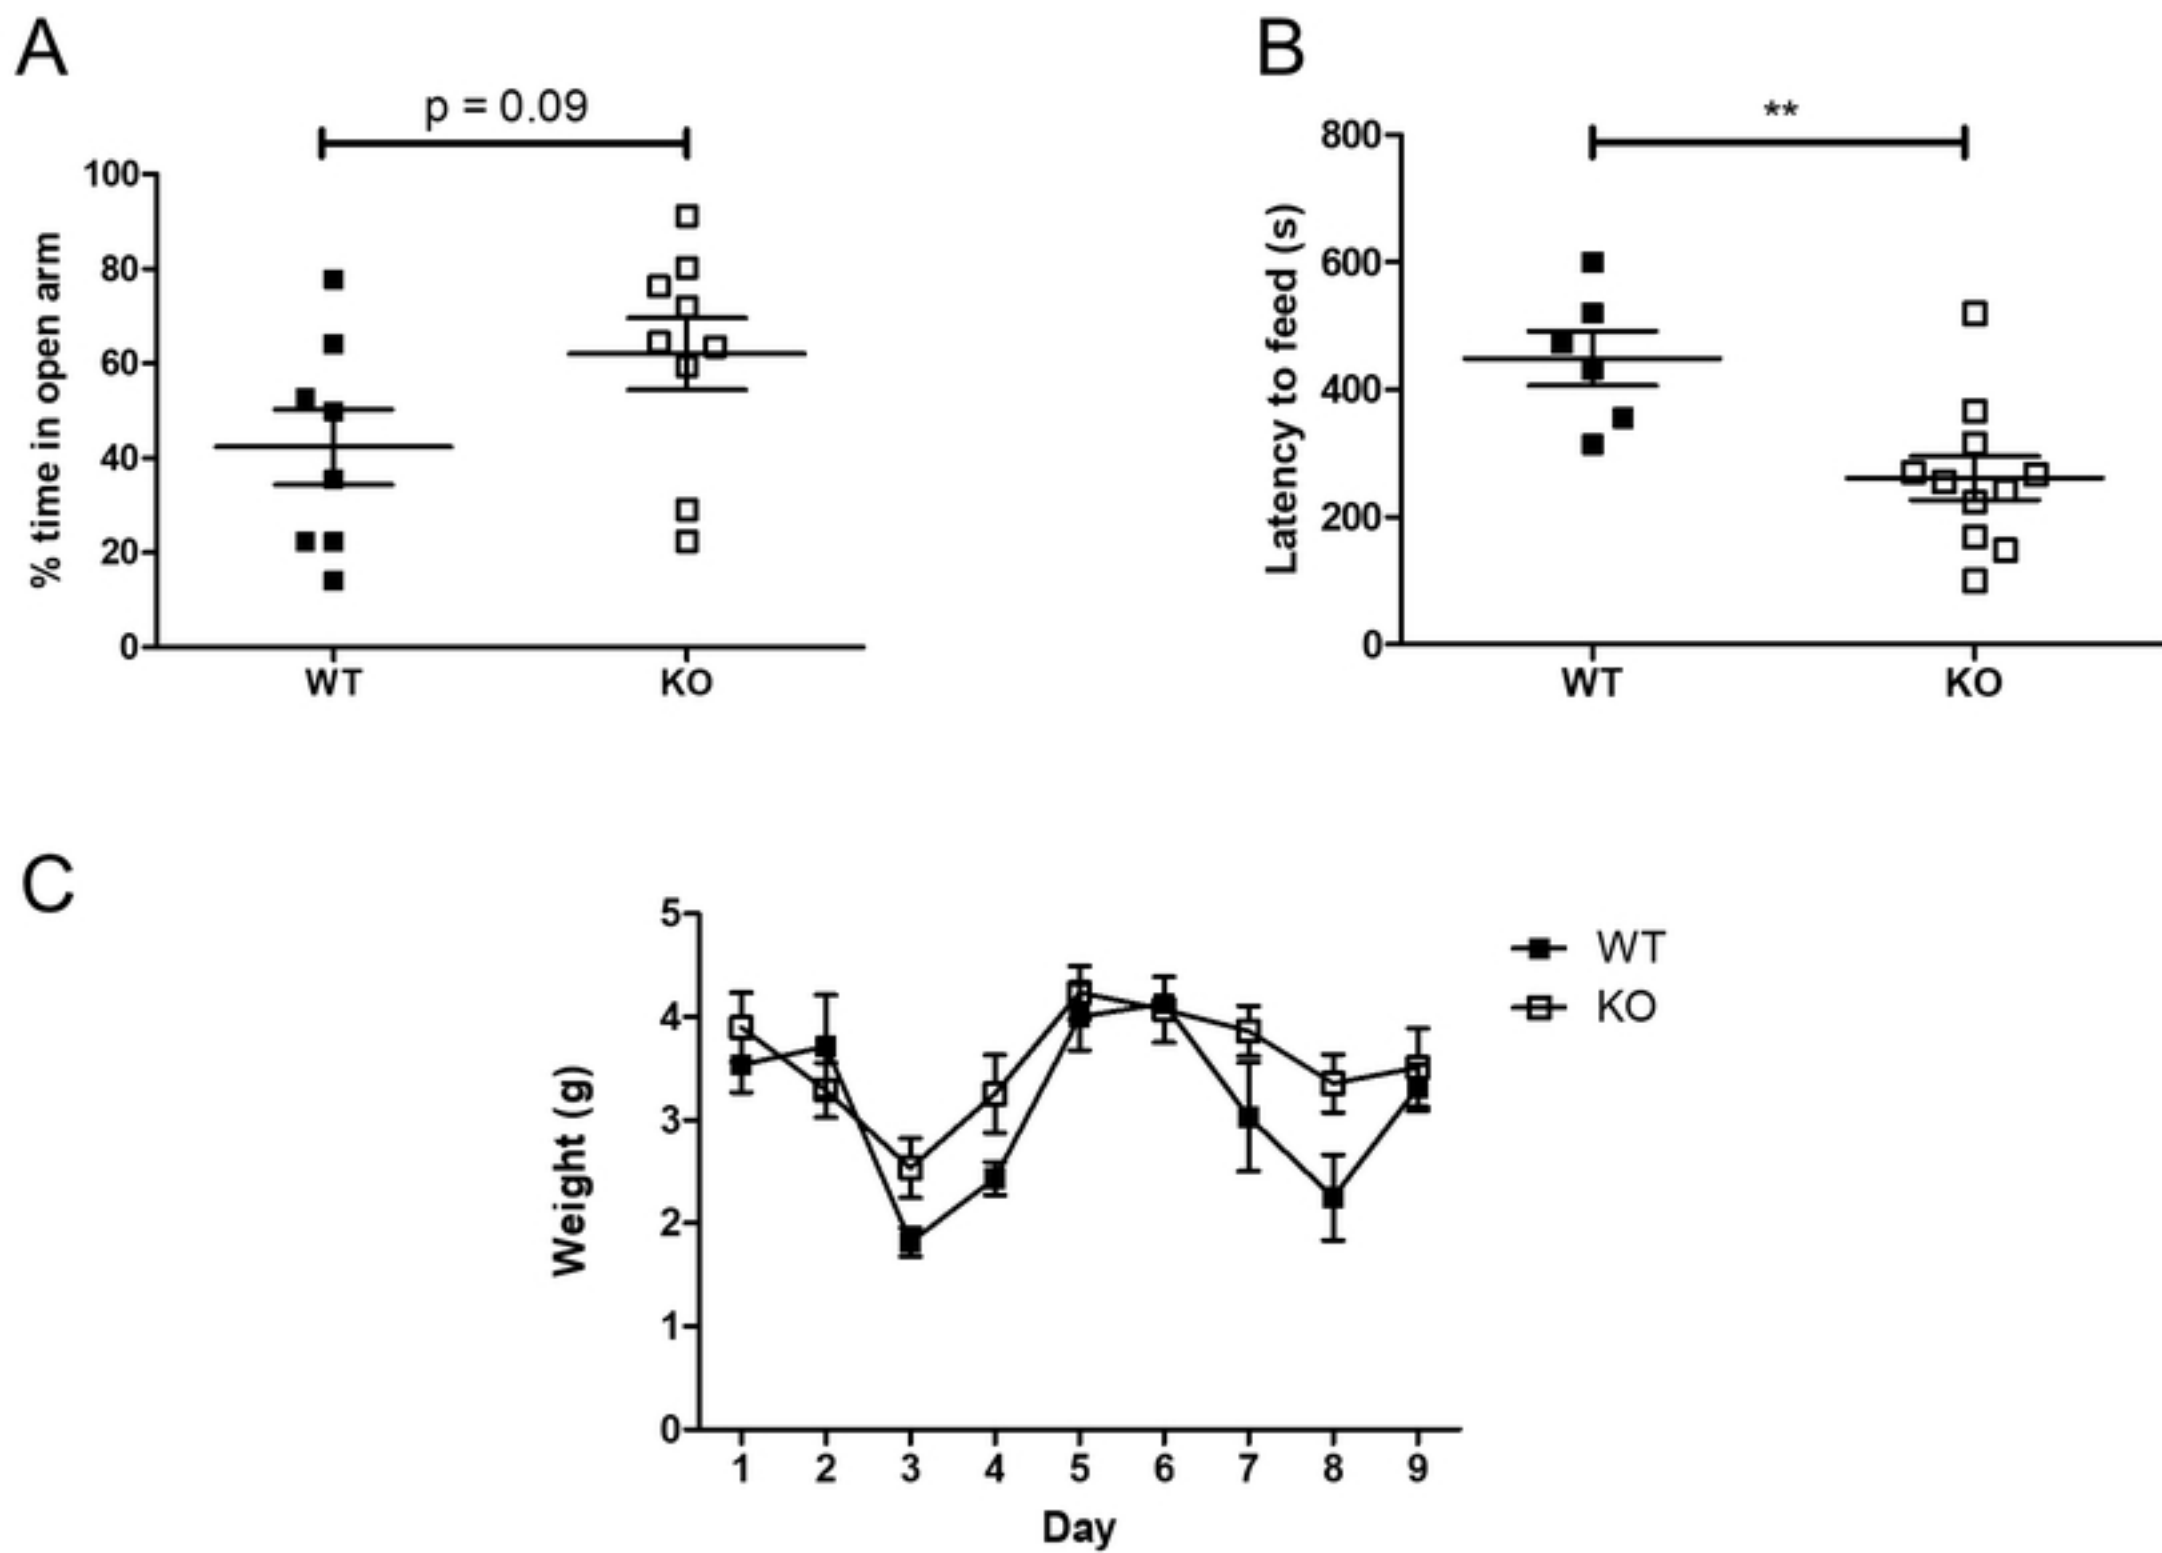

Figure 3

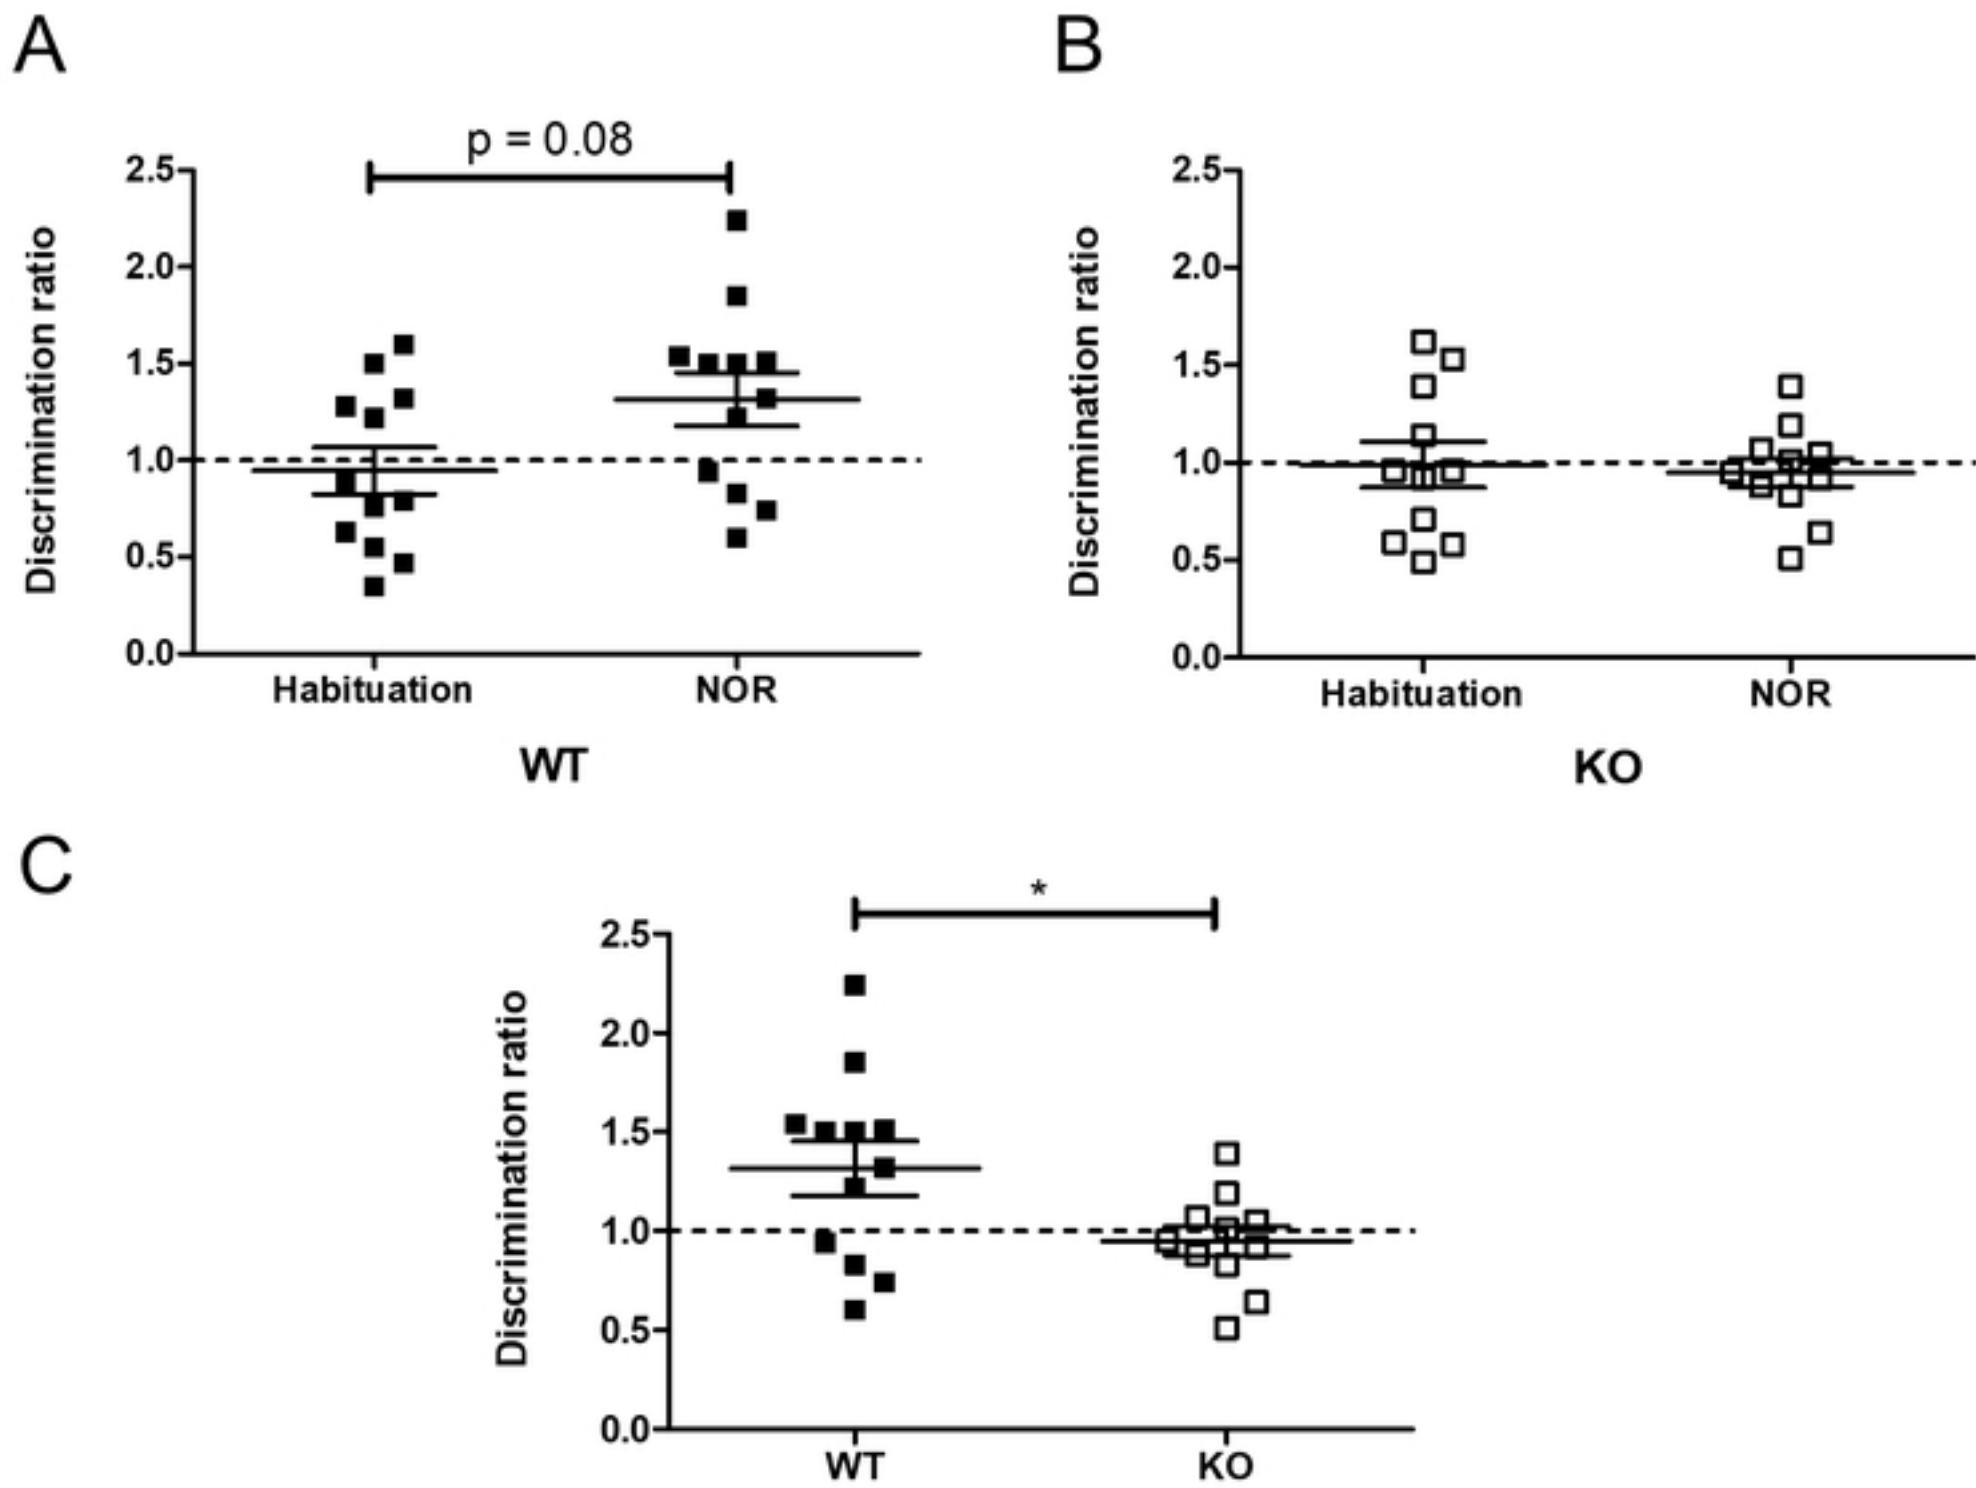

Figure 4

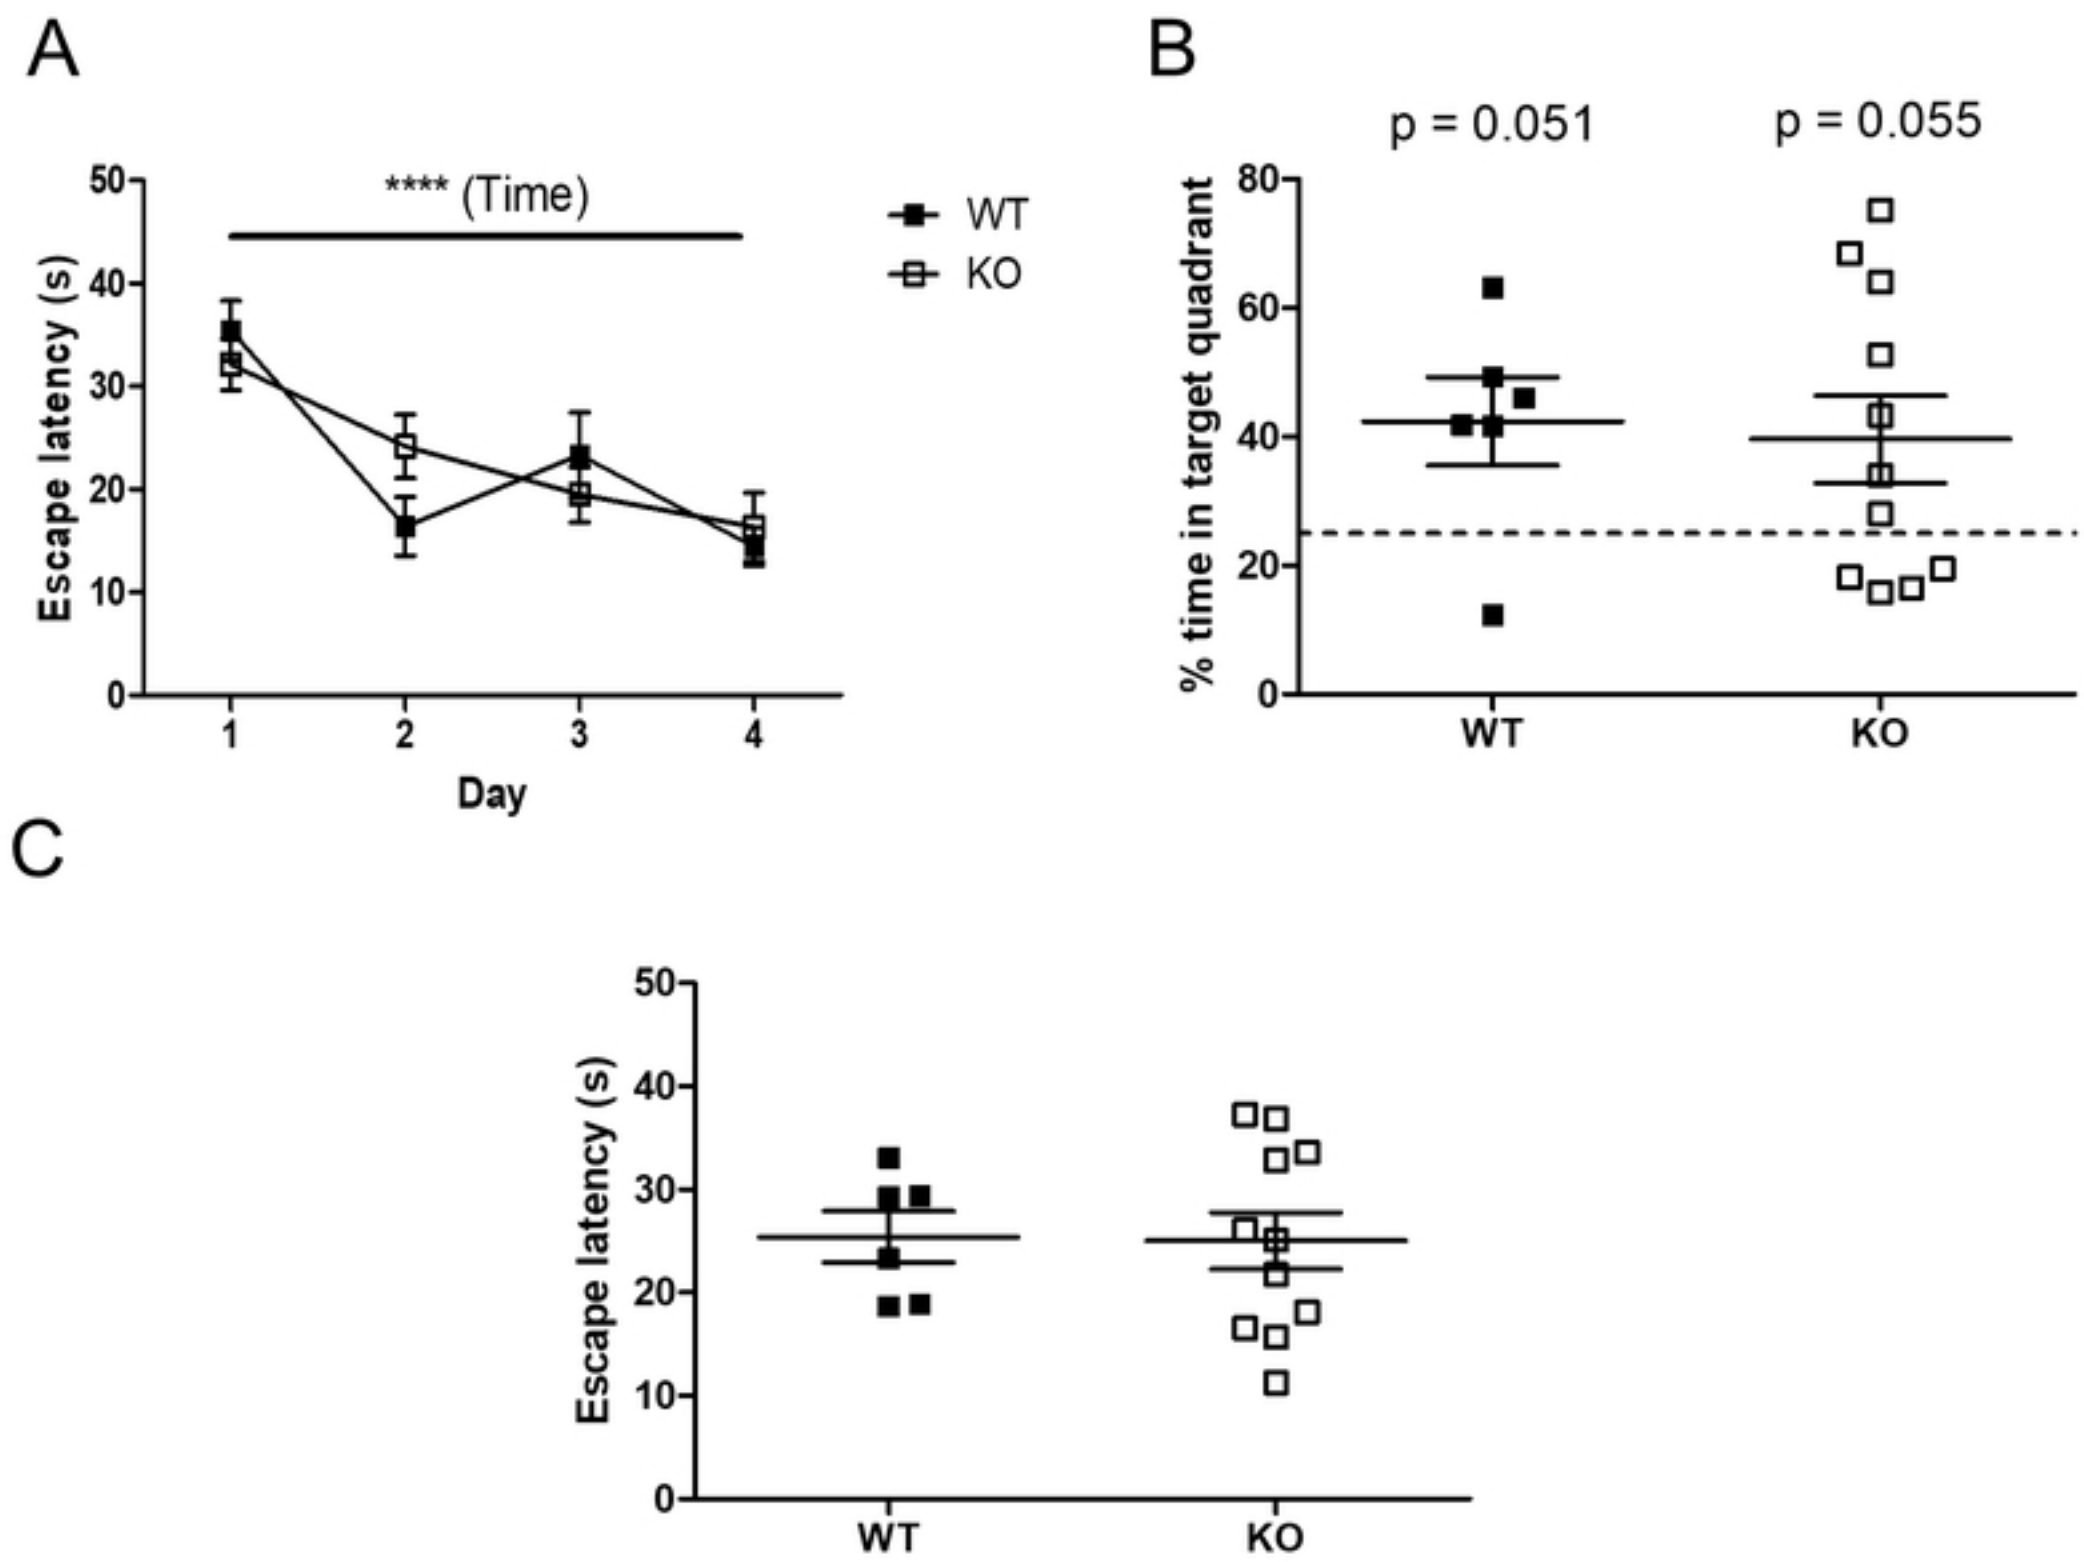

Figure 5
